# Supplementary material for: Effect of Solvent Treatment on the Composition and Structure of Santanghu Long Flame Coal and Its Rapid Pyrolysis Products
Source: MDPI journal article supplement (doi:10.3390/molecules28207074), 2023-10-13
Supplement: s1 [file s1]

# Supplementary Material

## Effect of Solvent Treatment on the Composition and Structure of Santanghu Long Flame Coal and Its Rapid Pyrolysis Products

Jia Guo <sup>1,2</sup>, Meixia Zhu <sup>2</sup>, Wenlong Mo <sup>1,2,\*</sup>, Yanxiong Wang <sup>2</sup>, Junrong Yuan <sup>2</sup>, Ronglan Wu <sup>2</sup>,  
Junmin Niu <sup>1,\*</sup>, Kongjun Ma <sup>2</sup>, Wencang Guo <sup>1</sup>, Xianyong Wei <sup>2,3</sup>, Xing Fan <sup>2</sup> and Naeem Akram <sup>4</sup>

<sup>1</sup> Xinjiang Energy Co., Ltd., Urumqi 830000, China; gj459824057@126.com (J.G.);  
hjpgwc@126.com (W.G.)

<sup>2</sup> State Key Laboratory of Chemistry and Utilization of Carbon Based Energy Resources and  
Key Laboratory of Coal Clean Conversion & Chemical Engineering Process  
(Xinjiang Uyghur Autonomous Region), School of Chemical Engineering and Technology,  
Xinjiang University, Urumqi 830046, China; 18580890109@163.com (M.Z.);  
18599119007@163.com (Y.W.); yuanjunrong321@163.com (J.Y.); wuronglan@163.com (R.W.);  
kjma@xju.edu.cn (K.M.); wei\_xianyong@163.com (X.W.); fanxing@sdust.edu.cn (X.F.)

<sup>3</sup> Key Laboratory of Coal Processing and Efficient Utilization, Ministry of Education, China  
University of Mining & Technology, Xuzhou 221116, China

<sup>4</sup> School of Chemical Engineering, Minhaj University Lahore, Lahore 54000, Pakistan;  
naeemakram63@gmail.com

\* Correspondence: mowenlong@xju.edu.cn (W.M.); njm555@139.com (J.N.)

**Table S1**

Alkanes detected in SLFC and SLFC-L

| Species                | Peak       | Compound                                   | CAS        | RC (area %) |        |
|------------------------|------------|--------------------------------------------|------------|-------------|--------|
|                        |            |                                            |            | SLFC        | SLFC-L |
| Normal alkanes (NAs)   | <b>15</b>  | Decane                                     | 124-18-5   | 2.06        | 1.90   |
|                        | <b>23</b>  | Undecane                                   | 1120-21-4  | 0.85        | 0.85   |
|                        | <b>34</b>  | Dodecane                                   | 112-40-3   | 1.25        | 1.09   |
|                        | <b>40</b>  | Tridecane                                  | 629-50-5   | 0.93        | 0.88   |
|                        | <b>45</b>  | Tetradecane                                | 629-59-4   | 0.79        | 0.74   |
|                        | <b>53</b>  | Hexadecane                                 | 544-76-3   | -           | 0.99   |
|                        | <b>54</b>  | Pentadecane                                | 629-62-9   | 0.99        | -      |
|                        | <b>62</b>  | Nonadecane                                 | 629-92-5   | -           | 0.60   |
|                        | <b>63</b>  | Hexadecane                                 | 544-76-3   | 0.65        | -      |
|                        | <b>69</b>  | Heptadecane                                | 629-78-7   | 1.03        | 0.81   |
|                        | <b>75</b>  | Pentadecane                                | 629-62-9   | -           | 0.67   |
|                        | <b>76</b>  | Octadecane                                 | 593-45-3   | 0.77        | -      |
|                        | <b>79</b>  | Eicosane                                   | 112-95-8   | -           | 0.78   |
|                        | <b>80</b>  | Nonadecane                                 | 629-92-5   | 0.81        | -      |
|                        | <b>84</b>  | Heneicosane                                | 629-94-7   | 0.89        | -      |
|                        | <b>104</b> | Tetratetracontane                          | 7098-22-8  | 6.76        | 5.64   |
| Branched alkanes (BAs) | <b>49</b>  | 2,6,10-Trimethyldodecane                   | 3891-98-3  | -           | 0.56   |
|                        | <b>50</b>  | 2,6,10-Trimethyltridecane                  | 3891-99-4  | 0.53        | -      |
|                        | <b>65</b>  | 2,6,10-Trimethyldodecane                   | 3891-98-3  | 0.32        | -      |
|                        | <b>83</b>  | 3-Ethyl-5-(2-ethylbutyl)octadecane         | 55282-12-7 | -           | 0.81   |
|                        | <b>87</b>  | Dodecane,5,8-diethyl-                      | 24251-86-3 | 0.97        | -      |
| Cyclic alkanes         | <b>93</b>  | Heptadecane,2,3-dimethyl-                  | 61868-03-9 | 2.00        | -      |
|                        | <b>33</b>  | Nonylcyclopropane                          | 74663-85-7 | 0.79        | -      |
|                        | <b>39</b>  | 1-Heptyl-2-methylcyclopropane              | 74663-91-5 | 0.89        | -      |
|                        | <b>106</b> | Cyclohexane,1,1'-dodecylidenebis[4-methyl- | 55334-09-3 | 3.02        | -      |
|                        | <b>108</b> | Cyclohexane,1,3,5-trimethyl-2-octadecyl-   | 55282-34-3 | 8.46        | 6.91   |

**Table S2**

Olefines detected in SLFC and SLFC-L

| Peak       | Compound                                 | CAS        | RC (area %) |        |
|------------|------------------------------------------|------------|-------------|--------|
|            |                                          |            | SLFC        | SLFC-L |
| <b>10</b>  | 2-Methylbicyclo[4.3.0]non-1(6)-ene       | 60223-07-6 | 0.26        | -      |
| <b>14</b>  | 1-Decene                                 | 872-05-9   | 0.57        | -      |
| <b>17</b>  | p-Mentha-1,5,8-triene                    | 21195-59-5 | 0.40        | -      |
| <b>18</b>  | (3E,5E)-2,6-Dimethyl-1,3,5,7-octatetrene | 460-01-5   | -           | 0.88   |
| <b>22</b>  | 3-Dodecene,(Z)-                          | 7239-23-8  | 1.42        | -      |
| <b>32</b>  | 1-Dodecene                               | 112-41-4   | -           | 0.67   |
| <b>38</b>  | 1-Tridecene                              | 2437-56-1  | -           | 0.85   |
| <b>42</b>  | Bicyclo[4.4.1]undeca-1,3,5,7,9-pentaene  | 2443-46-1  | 0.77        | -      |
| <b>44</b>  | 1-Tetradecene                            | 1120-36-1  | 0.67        | 0.78   |
| <b>52</b>  | Cetene                                   | 629-73-2   | 0.57        | 0.60   |
| <b>60</b>  | 1-Nonadecene                             | 18435-45-5 | -           | 0.42   |
| <b>67</b>  | 1-Heptadecene                            | 6765-39-5  | -           | 0.42   |
| <b>68</b>  | 5-Octadecene,(E)-                        | 7206-21-5  | 0.36        | -      |
| <b>70</b>  | 5-Methyl-1-undecene                      | 74630-38-9 | -           | 2.26   |
| <b>71</b>  | Tridecane,7-methylene-                   | 19780-80-4 | 2.35        | -      |
| <b>73</b>  | Heneicosene                              | 27400-79-9 | -           | 0.53   |
| <b>74</b>  | 1-Heptadecene                            | 6765-39-5  | 0.45        | -      |
| <b>77</b>  | 1-Docosene                               | 1599-67-3  | -           | 0.63   |
| <b>78</b>  | 1-Nonadecene                             | 18435-45-5 | 0.55        | -      |
| <b>88</b>  | 17-Pentatriacontene                      | 6971-40-0  | -           | 0.70   |
| <b>92</b>  | 1-Hexacosene                             | 18835-33-1 | -           | 1.09   |
| <b>99</b>  | 17-Pentatriacontene                      | 6971-40-0  | 2.13        | -      |
| <b>103</b> | Squalene                                 | 111-02-4   | 3.22        | 3.07   |

**Table S3**

Arenes detected in SLFC and SLFC-L

| Species                                | Peak | Compound                                    | CAS        | RC (area %) |        |
|----------------------------------------|------|---------------------------------------------|------------|-------------|--------|
|                                        |      |                                             |            | SLFC        | SLFC-L |
| Monocyclic aromatics (MAs)             | 1    | 1,3,5-Cycloheptatriene                      | 108-88-3   | 1.96        | -      |
|                                        | 6    | p-Xylene                                    | 106-42-3   | 1.21        | -      |
|                                        | 7    | 1,2-xylene                                  | 95-47-6    | -           | 1.55   |
|                                        | 8    | Ethylbenzene                                | 100-41-4   | 1.74        | -      |
|                                        | 11   | 1-ethyl-2-methyl-Benzene                    | 611-14-3   | 0.67        | -      |
|                                        | 13   | Mesitylene                                  | 108-67-8   | -           | 0.60   |
|                                        | 16   | Benzene,(1-methylethyl)-                    | 98-82-8    | 0.77        | -      |
|                                        | 20   | 1,2,4,5-Tetramethylbenzene                  | 95-93-2    | 0.36        | -      |
|                                        | 26   | Benzene,2,4-diethyl-1-methyl-               | 1758-85-6  | -           | 0.28   |
|                                        | 28   | Benzene, 1-ethyl-2,4-dimethyl-              | 874-41-9   | 0.81        | -      |
| Polycyclic aromatic hydrocarbon (PAHs) | 51   | Benzene, octyl-                             | 2189-60-8  | -           | 0.63   |
|                                        | 56   | 1,1,4,5,6-Pentamethyl-2,3-dihydro-1H-indene | 16204-67-4 | 0.40        | -      |
|                                        | 30   | 1H-Indene, 3-methyl-                        | 767-60-2   | 0.75        | 1.23   |
|                                        | 41   | 7H-Benzocycloheptene                        | 264-09-5   | -           | 0.81   |
|                                        | 43   | 1-Methylnaphthalene                         | 90-12-0    | 0.71        | 0.88   |
|                                        | 46   | Naphthalene,1-(2-propen-1-yl)-              | 2489-86-3  | -           | 0.42   |
|                                        | 47   | 1,4-Dimethylnaphthalene                     | 571-58-4   | 0.34        | -      |
|                                        | 48   | 1,7-Dimethylnaphthalene                     | 575-37-1   | -           | 0.42   |
|                                        | 64   | 1,4,5-Trimethylnaphthalene                  | 2131-41-1  | 0.83        | 1.13   |
|                                        | 66   | Naphthalene,1,6-dimethyl-4-(1-methylethyl)- | 483-78-3   | 0.28        | -      |
|                                        | 90   | Retene                                      | 483-65-8   | 1.25        | -      |

**Table S4**

Oxygen-containing organic compounds detected in SLFC and SLFC-L

| Species                   | Peak | Compound                                                                                                                                               | CAS         | RC (area %) |        |
|---------------------------|------|--------------------------------------------------------------------------------------------------------------------------------------------------------|-------------|-------------|--------|
|                           |      |                                                                                                                                                        |             | SLFC        | SLFC-L |
| Alcohols                  | 4    | Bicyclo[2.2.1]hept-2-en-7-ol                                                                                                                           | 53783-87-2  | 0.26        | -      |
|                           | 5    | D-erythro-L-galacto-Octopyranose, α-(8CI)                                                                                                              | 5329-49-7   | 0.55        | -      |
|                           | 9    | Z,Z-2,5-Pentadecadien-1-ol                                                                                                                             | 139185-79-8 | 0.49        | -      |
|                           | 21   | 1-Undecanol                                                                                                                                            | 112-42-5    | -           | 0.99   |
|                           | 24   | 3-Cyclohexen-1-ol,5-methylene-6-(1-methylethenyl)-                                                                                                     | 54274-41-8  | 0.34        | -      |
|                           | 31   | 2-Hydroxytetralin                                                                                                                                      | 530-91-6    | -           | 0.35   |
|                           | 36   | (1-Benzyl-cyclopropyl)-methanol                                                                                                                        | 108546-79-8 | -           | 0.42   |
|                           | 37   | 1-Naphthalenol,1,2,3,4-tetrahydro-3-methyl-                                                                                                            | 3344-45-4   | 0.45        | 0.81   |
|                           | 55   | 2,9-Heptadecadiene-4,6-diyn-8-ol, (Z,E)-                                                                                                               | 50816-77-8  | -           | 0.39   |
|                           | 61   | Hexadecanol; 1-Cetanol                                                                                                                                 | 36653-82-4  | 0.38        | -      |
|                           | 72   | 3,7,11-Trimethyl-1-dodecanol                                                                                                                           | 6750-34-1   | 0.43        | 0.39   |
|                           | 91   | Lycopene,1,2-dihydro-1-hydroxy                                                                                                                         | 105-92-0    | -           | 0.46   |
|                           | 107  | 1-Hentetracontanol                                                                                                                                     | 40710-42-7  | -           | 2.61   |
|                           | 109  | Octacosanol                                                                                                                                            | 557-61-9    | -           | 26.60  |
|                           | 110  | 1-Hexacosanol                                                                                                                                          | 506-52-5    | 22.81       | -      |
| Carboxylic acids<br>(CAs) | 27   | Methyl 4,6-tetradecadiynoate                                                                                                                           | NA          | 0.24        | -      |
|                           | 57   | 2-Oxiraneoctanoic acid,3-octyl-, (2R,3S)-rel-                                                                                                          | 24560-98-3  | -           | 0.28   |
|                           | 58   | 2,5-Octadecadiynoic acid,methyl ester                                                                                                                  | 57156-91-9  | -           | 0.39   |
|                           | 59   | Naproxen                                                                                                                                               | 22204-53-1  | 0.42        | -      |
|                           | 81   | Ethyliso-allocholate                                                                                                                                   | 47676-48-2  | 0.47        | -      |
|                           | 82   | Kaur-16-ene-3,7,15,18-tetrol,7,18-diacetate, (3a,4b,7b,15a)- (9CI)                                                                                     | 70902-37-3  | -           | 0.46   |
|                           | 85   | Ethyliso-allocholate                                                                                                                                   | 47676-48-2  | -           | 1.27   |
|                           | 86   | Lauric acid (1aR)-1α,2,5,5a,6,9,10,10α-octahydro-5aβ-hydroxy-4-hydroxymethyl-1,1,7,9α-tetramet                                                         | 77508-68-0  | -           | 0.85   |
|                           | 95   | Oleic acid,eicosyl este                                                                                                                                | 22393-88-0  | -           | 1.48   |
|                           | 96   | 7,8-Epoxy lanostan-11-ol,3-acetoxy-Lauric acid (1aR)-1α,2,5,5a,6,9,10,10α-octahydro-5aβ-hydroxy-4-hydroxymethyl-1,1,7,9α-tetramet                      | NA          | -           | 0.92   |
|                           | 97   | 9,19-Cyclolanostan-3-ol,24,24-epoxymethano-, acetate                                                                                                   | 77508-68-0  | 1.03        | -      |
|                           | 98   | 5H-Cyclopropa(3,4)benz(1,2-e)azulen-5-one,1,1a-1b-4,4a,7a-7b,8,9,9a-decahydro-7b-9-9a-trihydroxy-3-hydroxymethyl-1,1,6,8-tetramethyl-4a-methoxy-,9,9a- | NA          | -           | 1.94   |
|                           | 100  |                                                                                                                                                        | 54870-24-5  | -           | 2.47   |

|           |            |                                                |              |      |      |
|-----------|------------|------------------------------------------------|--------------|------|------|
|           |            | didecanoate                                    |              |      |      |
|           | <b>101</b> | Oleic acid,eicosyl ester                       | 22393-88-0   | 1.17 | -    |
|           | <b>105</b> | Oleic acid,3-(octadecyloxy)propyl ester        | 17367-41-8   | 1.72 | -    |
| Ethers    | <b>29</b>  | Naphthalene,1,2,3,4-tetrahydro-1-methoxy-      | 1008-18-0    | -    | 0.78 |
|           | <b>89</b>  | 5a-Cholestan-3-one, cyclic-1,2-ethanediylaetal | 25328-53-4   | 0.81 | -    |
|           | <b>94</b>  | Tetradecane,1-(tetradecyloxy)-                 | 5412-98-6    | -    | 1.09 |
|           | <b>102</b> | 1,1'-[Ethylenebis(oxy)]bis[(Z)-9-octadecene]   | 17367-13-4   | 6.48 | -    |
| Aldehydes | <b>25</b>  | 3-O-Benzyl-d-glucose                           | 10230-17-8   | 0.59 | -    |
|           | <b>35</b>  | 5,8-Decadien-2-one,5,9-dimethyl-,(E)-          | 130876 -99-2 | 0.43 | -    |

**Table S5**

Other heteroatom-containing organic compounds detected in SLFC and SLFC-L

| Peak      | Compound              | CAS       | RC (area %) |        |
|-----------|-----------------------|-----------|-------------|--------|
|           |                       |           | SLFC        | SLFC-L |
| <b>2</b>  | 1,1,2-trichloroethane | 79-00-5   | -           | 3.42   |
| <b>3</b>  | Tetrachloroethylene   | 127-18-4  | -           | 5.92   |
| <b>12</b> | P-methylampeamine     | 1964/11/9 | 0.40        | -      |
| <b>19</b> | Hexachloroethane      | 67-72-1   | -           | 1.66   |
